# Supplementary material
Source: Springer Nature journal article supplement (https://www.springermedizin.de/resource/supplementary/12913_2007_586_MOESM3_ESM.pdf/9535462)

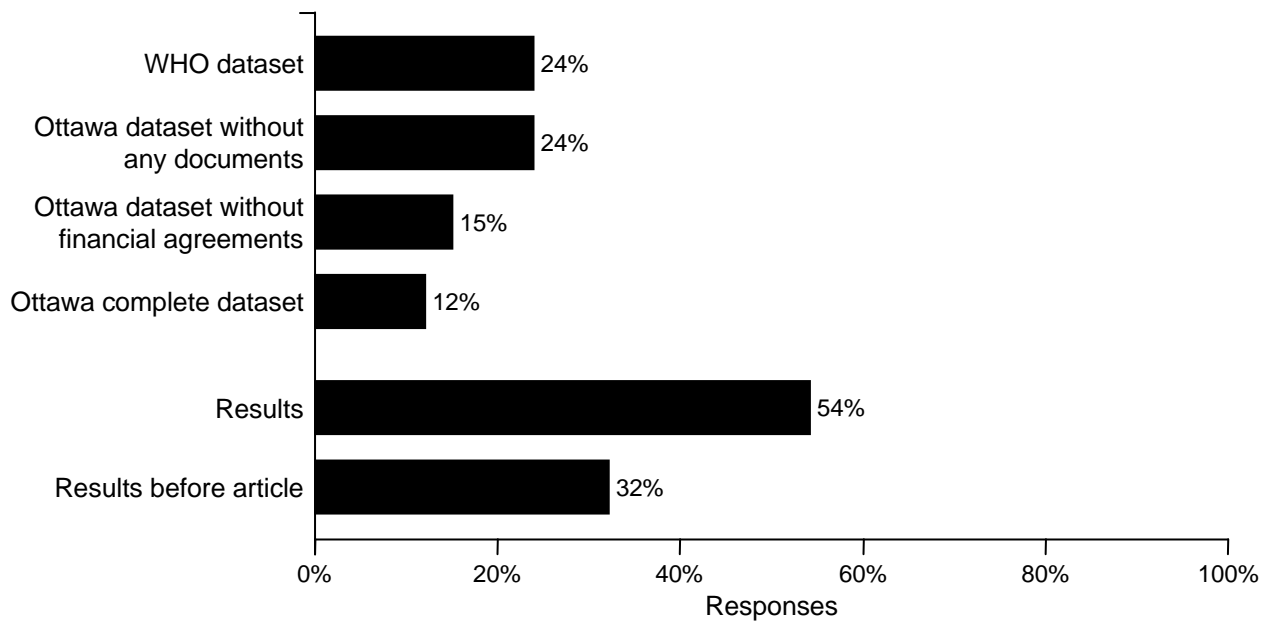

Supplement: MOESM3 [file 9535462]
